# Supplementary material for: Effects of resin I on the catalytic oxidation of n-C7asphaltenes in the presence of silica-based nanoparticles
Source: Royal Society of Chemistry journal article supplement (doi:10.1039/c6ra17554f), 2016-01-01
Supplement: c6ra17554f1.pdf [file c6ra17554f1.pdf]

## SUPPORTING INFORMATION FOR

### Effects of Resin I on the Catalytic Oxidation of *n*-C<sub>7</sub> Asphaltenes in the Presence of Silica-Based Nanoparticles

Mónica M. Lozano,<sup>1</sup> Camilo A. Franco<sup>1,4</sup>, Socrates A. Acevedo<sup>2</sup>, Nashaat N. Nassar<sup>3</sup>,  
Farid B. Cortés<sup>1,4</sup>

1. Grupo de Investigación en Fenómenos de Superficie - Michael Polanyi, Departamento de Química y Petróleos, Facultad de Minas, Universidad Nacional de Colombia Sede Medellín, Cra 80 No. 65-223, Medellín, Colombia.
2. Escuela de Química, Facultad de Ciencias, Universidad Central de Venezuela, Caracas 1041-A, Venezuela.
3. Department of Chemical and Petroleum Engineering, University of Calgary, 2500 University Drive NW, Calgary, Alberta, Canada.

Grupo de Investigación en Yacimientos de Hidrocarburos, Facultad de Minas, Universidad Nacional de Colombia Sede Medellín, Cra 80 No. 65-223, Medellín,

#### Prediction of the Amount of *n*-C<sub>7</sub> Asphaltenes Adsorbed.

Prediction of the amount of *n*-C<sub>7</sub> asphaltenes according to the procedure described in our previous work. A good prediction is expected to result in a linear plot of the amount adsorbed predicted ( $q_{predicted}$ ) vs. the experimentally observed amount adsorbed ( $q_{experimental}$ ). A good prediction imply that the slope ( $m$ ) and the intercept ( $b$ ) of the equation of a straight line should be equal to 1.0 and 0.0, with a  $R^2 = 1.0$ . In this case, amount of *n*-C<sub>7</sub> asphaltenes adsorbed in absence of resins I was predicted from adsorption at A:R ratios of 3:7 and 7:3.

Figure S1 shows Linear plots of  $q_{predicted}$  vs  $q_{experimental}$  for the individual adsorption of *n*-C<sub>7</sub> asphaltenes and *n*-C<sub>7</sub> asphaltenes in the presence of resin I and for different A:R ratios over

SNi1Pd1 nanoparticles. Also, Table S1 shows the estimated slope and intercept of the straight-line equation together with the corresponding values of  $R^2$ .

Figure S1 shows that there is an excellent prediction of the  $n\text{-C}_7$  asphaltenes adsorbed in absence of resins I was from the experimental adsorption at A:R ratios of 3:7 and 7:3. This is corroborated by values of  $m$  and  $b$  that have an estimated deviation less than 5%.

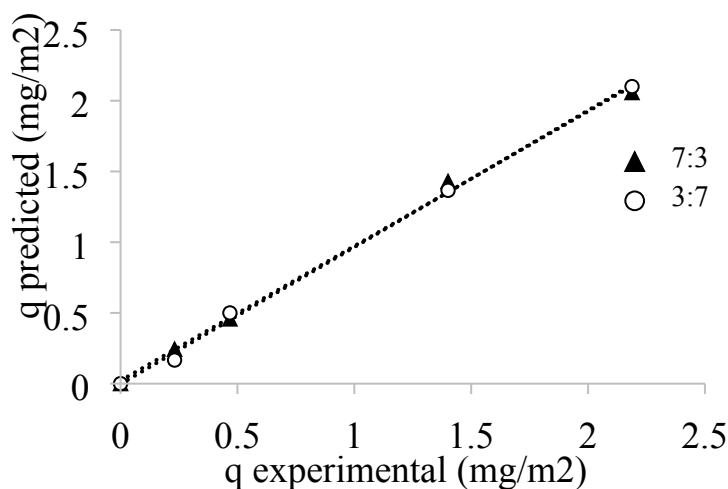

**Figure S1.** Linear plots of  $q_{\text{predicted}}$  vs  $q_{\text{experimental}}$  for the individual adsorption of  $n\text{-C}_7$  asphaltenes and  $n\text{-C}_7$  asphaltenes in the presence of resin I and for different A:R ratios over SNi1Pd1 nanoparticles.

**Table S1.** Estimated Slope and Intercept of the Linear plot of  $q_{\text{predicted}}$  vs  $q_{\text{experimental}}$  for the Prediction of the Amount of  $n\text{-C}_7$  Asphaltenes Adsorbed over SNi1Pd1 nanoparticles in the Absence and the Presence of Resin I

| A:R ratio | $m$  | $b$   | $R^2$ |
|-----------|------|-------|-------|
| 7:3       | 0.96 | 0.021 | 0.99  |
| 3:7       | 0.97 | 0.002 | 0.99  |
